# Supplementary material
Source: Research Square preprint supplement (doi:10.21203/rs.3.rs-9883712/v1)
Supplement: Supplementary file 1 [file 076af504d0f3c0720d67eb1f.pdf]

## Supplement 1 - image documentation

539 Transition from Stratigraphic to Disturbed ice

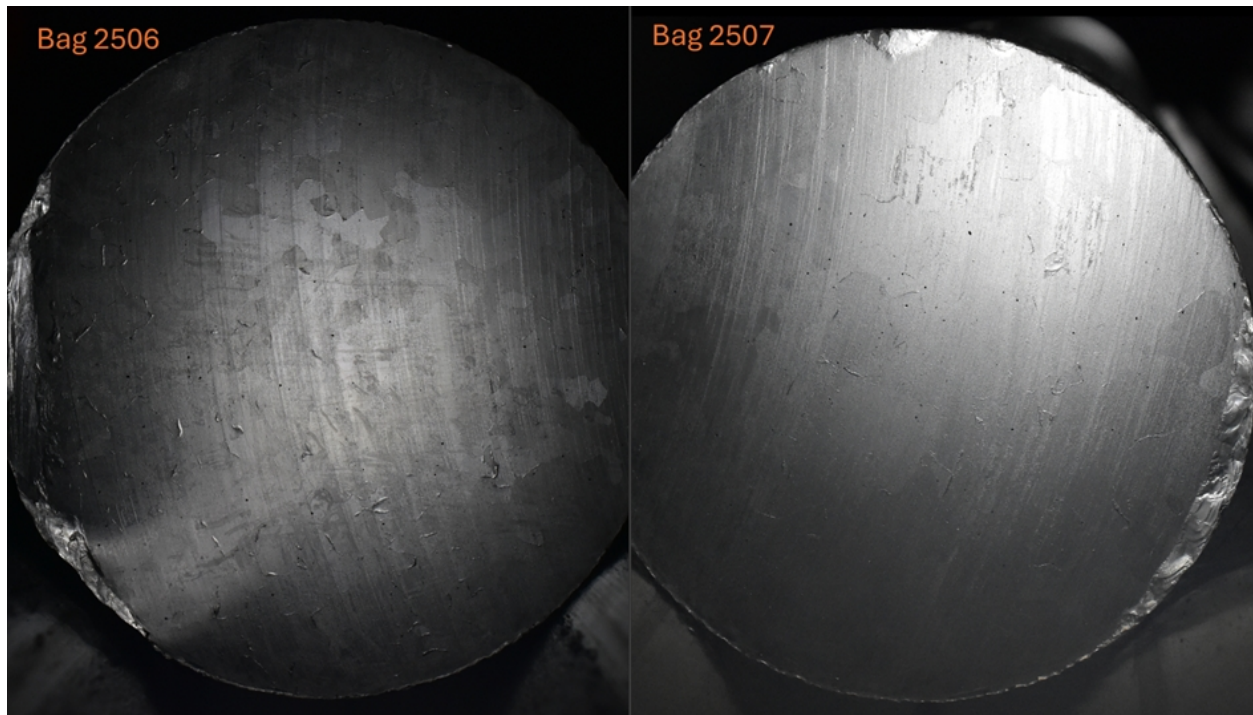

540

541 *Figure S1\_1: change of crystal boundaries. The ratio boundary to crystal area (or perimeter) decreases and crystals appear more*  
542 *rounded. Bag 2506 to 2507 marks the transition into the disturbed ice zone.*

543 Crystal size from ice drill surface cuttings

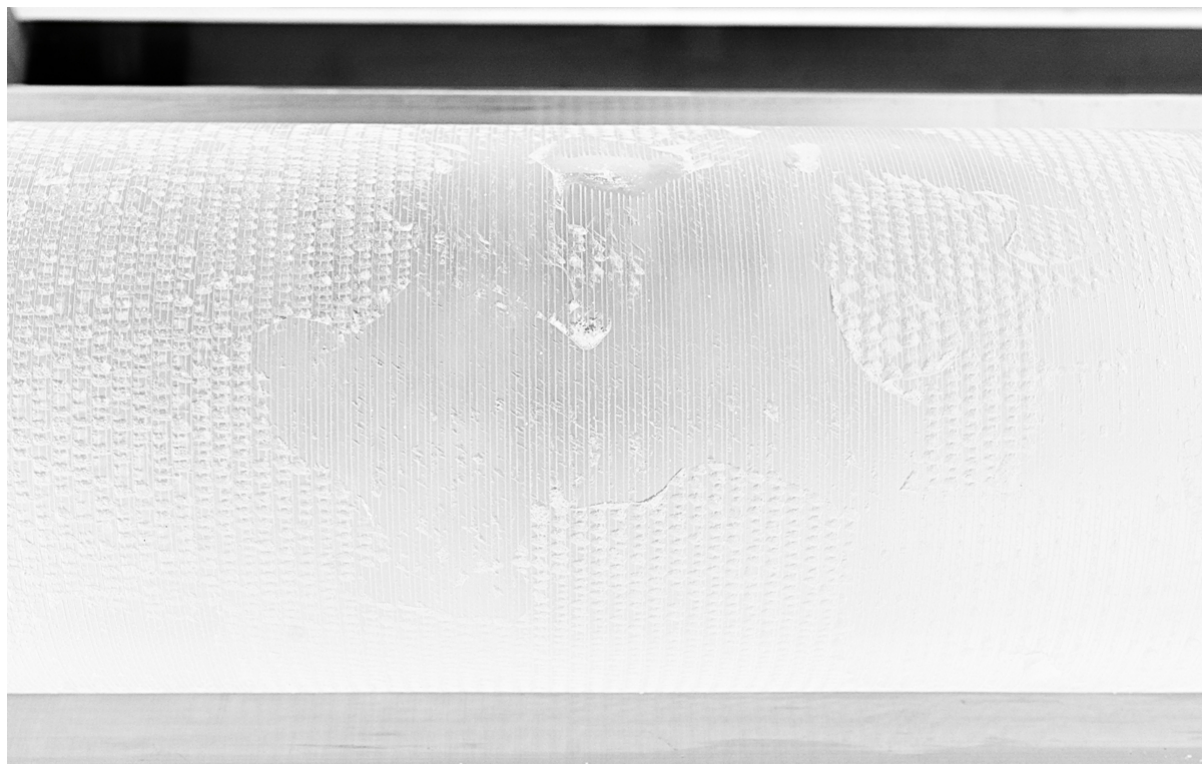

544

545 *Figure S1\_2: Bag 2586 shows characteristic cutter marks on the core surface caused by variable crystal orientation. The core*  
546 *diameter is 98 mm; the image width is ~200 mm.*

547

548 Aggregates similar to the ones from the Dome C core

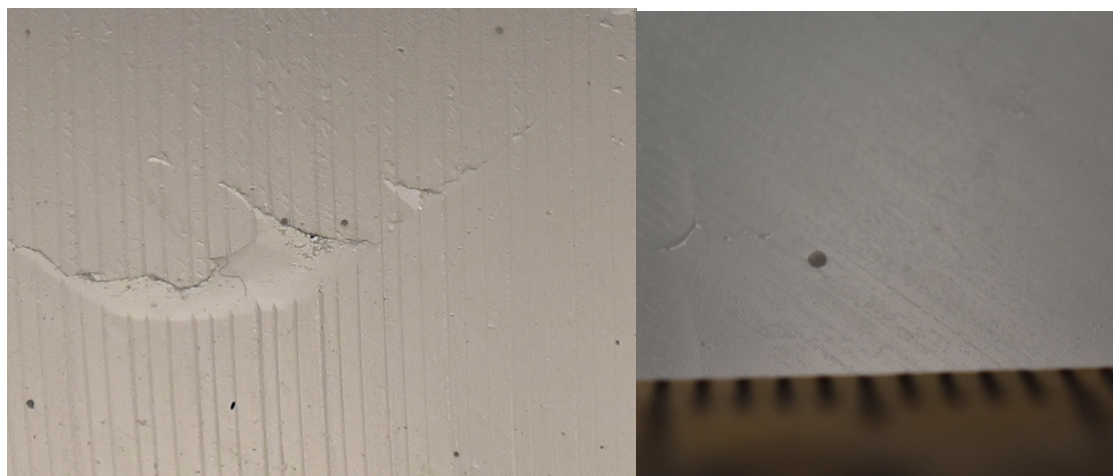

549

550 *Figure S1\_3: Aggregates similar to the ones from the Dome C core. Scale on the picture to the right.*

551

552 Subglacial material from the drill and drill chips

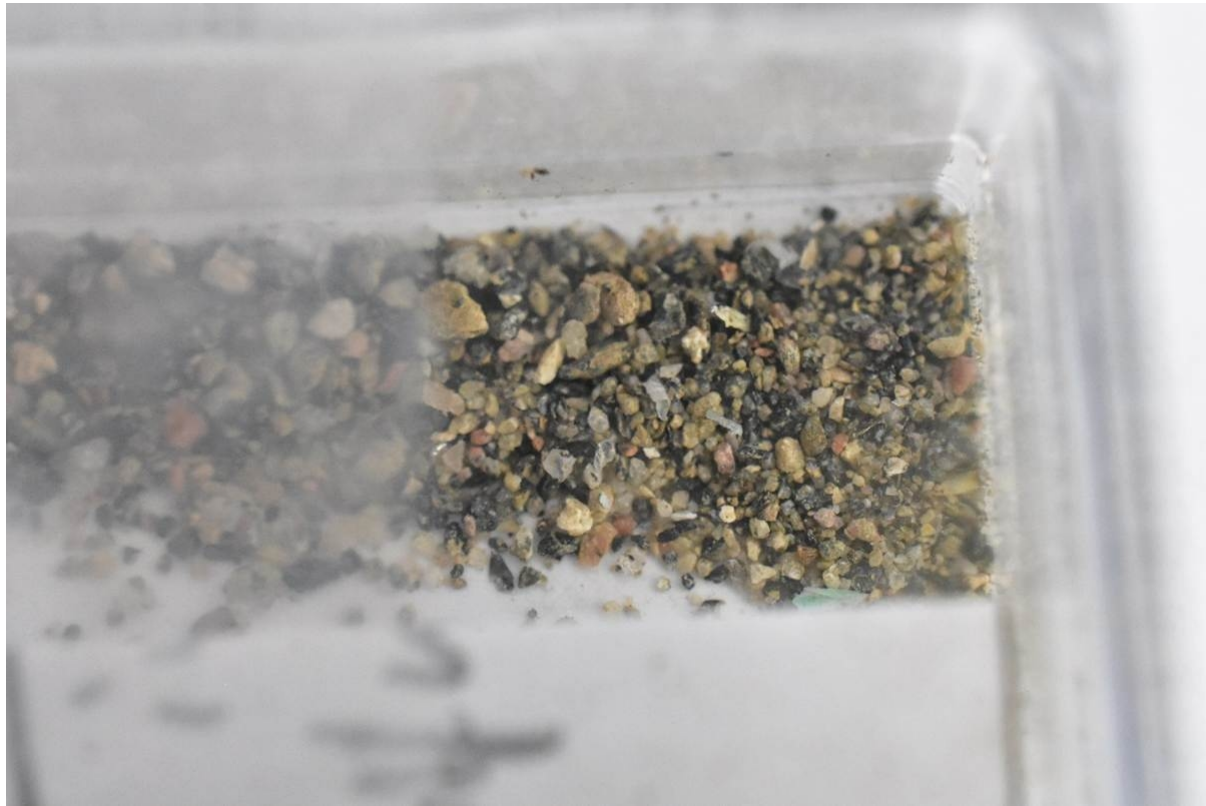

553  
554 *Figure S1\_4: Run #891, corresponds to bag 2796-D. Fig. 3, orange star - Sand and gravel.* Fig

555

556

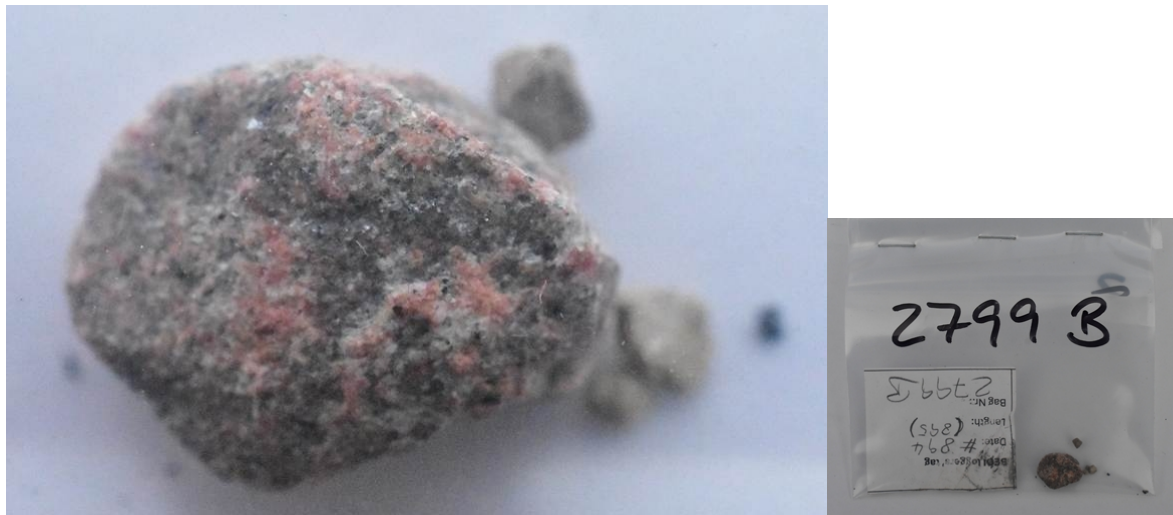

557  
558 *Figure S1\_5: Run #895, bag 2799-B. Fig. 3, orange star - Granitic pebble of almost 2 cm diameter.*

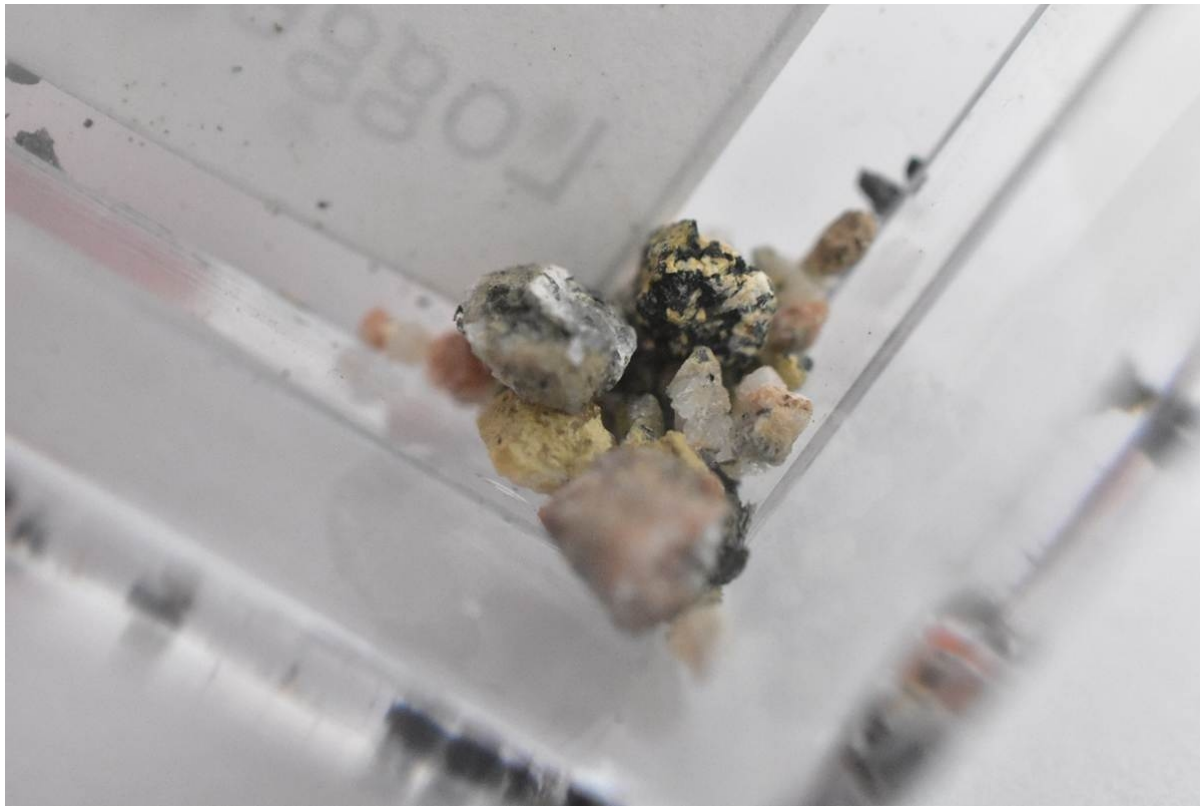

559

560 *Figure S1\_6: Run #896, corresponds to bag 2799-C and 2799-D. Fig. 3, orange star - Fine gravel.*

561

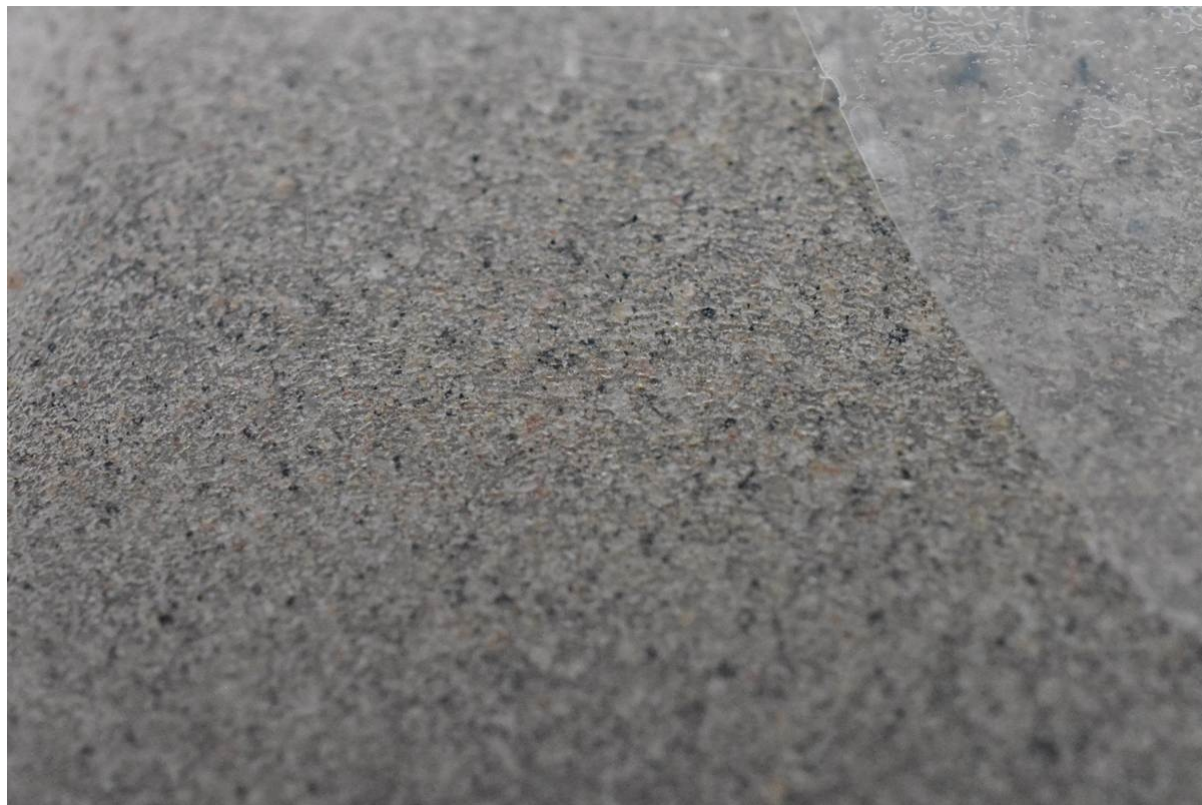

562

563 *Figure S1\_7: Run #901 and #902, bag 2799-D, no core run. 79 cm above bedrock. Depth 2799.04m. Fig. 3, orange star - sand.*

564

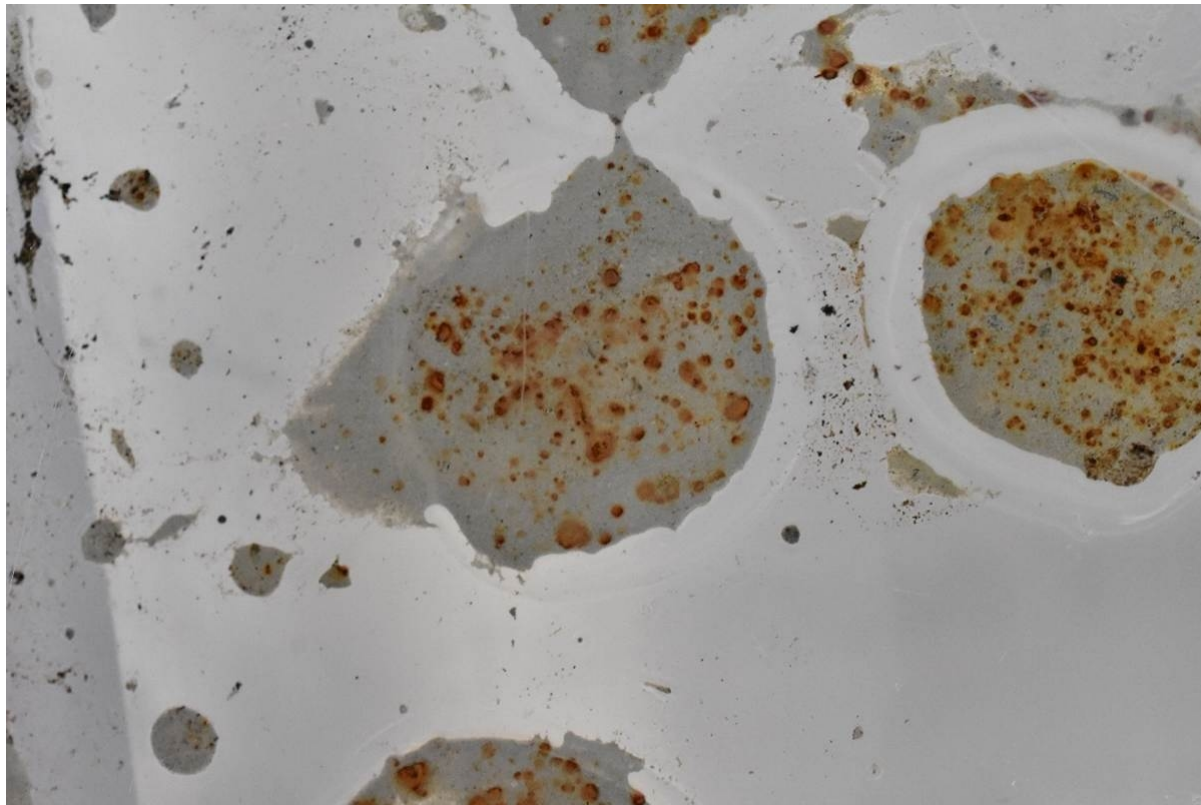

565

566 *Figure S1\_8: Run #905, depth 2799.85m. Material from the bottom of the ice sheet, no core run.*

567

568

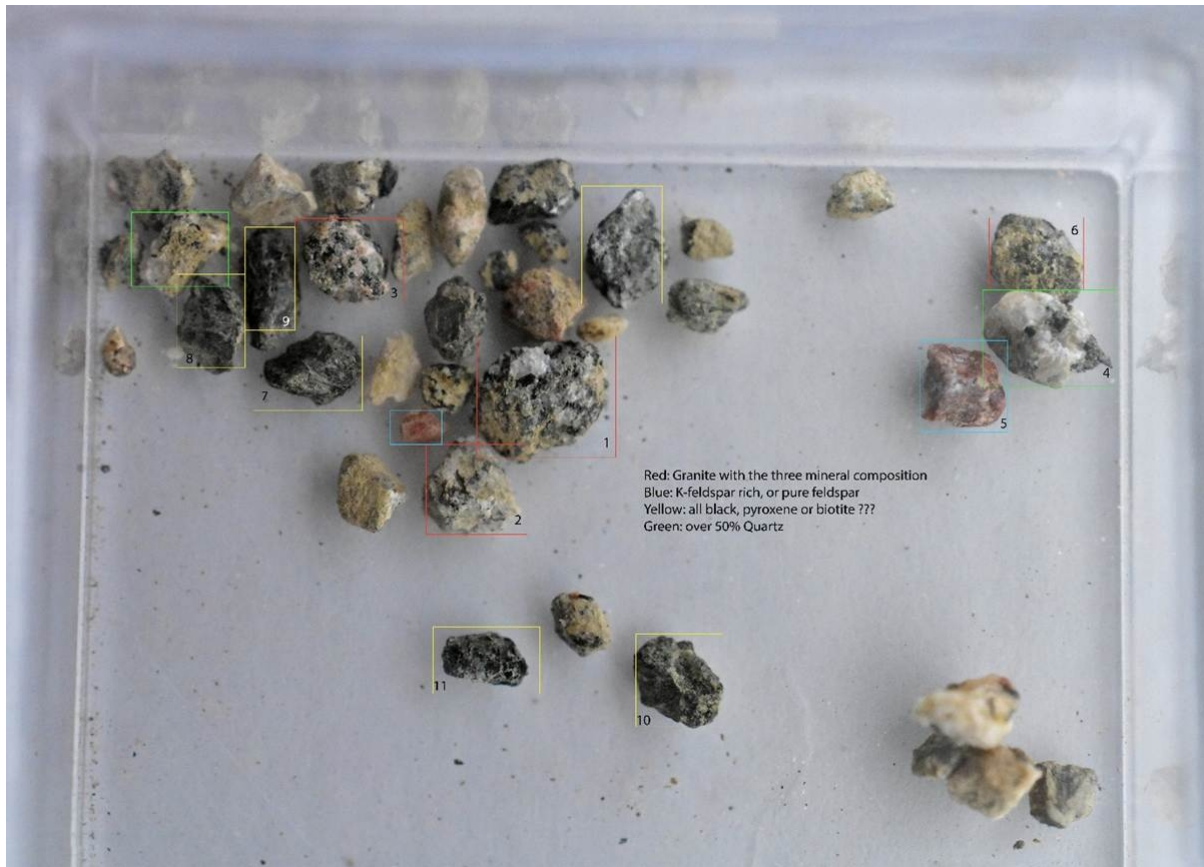

570 *Figure S1\_9: Rocks collected from various depths of the debris-rich ice zone. High resolution image used for initial analysis of*  
571 *subglacial lithology. Red boxes are of typical granite composition, blue K-feldspar rich or pure feldspar, pyroxene, mica, and green*  
572 *samples with over 50% quartz.*  
573

574 Text and additional inspection by: <https://mycleverai.com/rock-identifier>

575 This revealed the same results as inspection by eye.

576 Based on the visual characteristics, these appear to be fragments of **granite**. Granite is a common  
577 **igneous rock** composed primarily of the minerals **quartz**, **feldspar** (specifically potassium  
578 feldspar and plagioclase feldspar), and **mica** (biotite and/or muscovite). The individual grains  
579 visible in the samples suggest this phaneritic texture, where the crystals are large enough to be seen  
580 with the naked eye. The speckled appearance with varying colours (grey, white, black, and some  
581 hints of pink or reddish hues which could indicate the presence of potassium feldspar) is  
582 characteristic of granite.

583

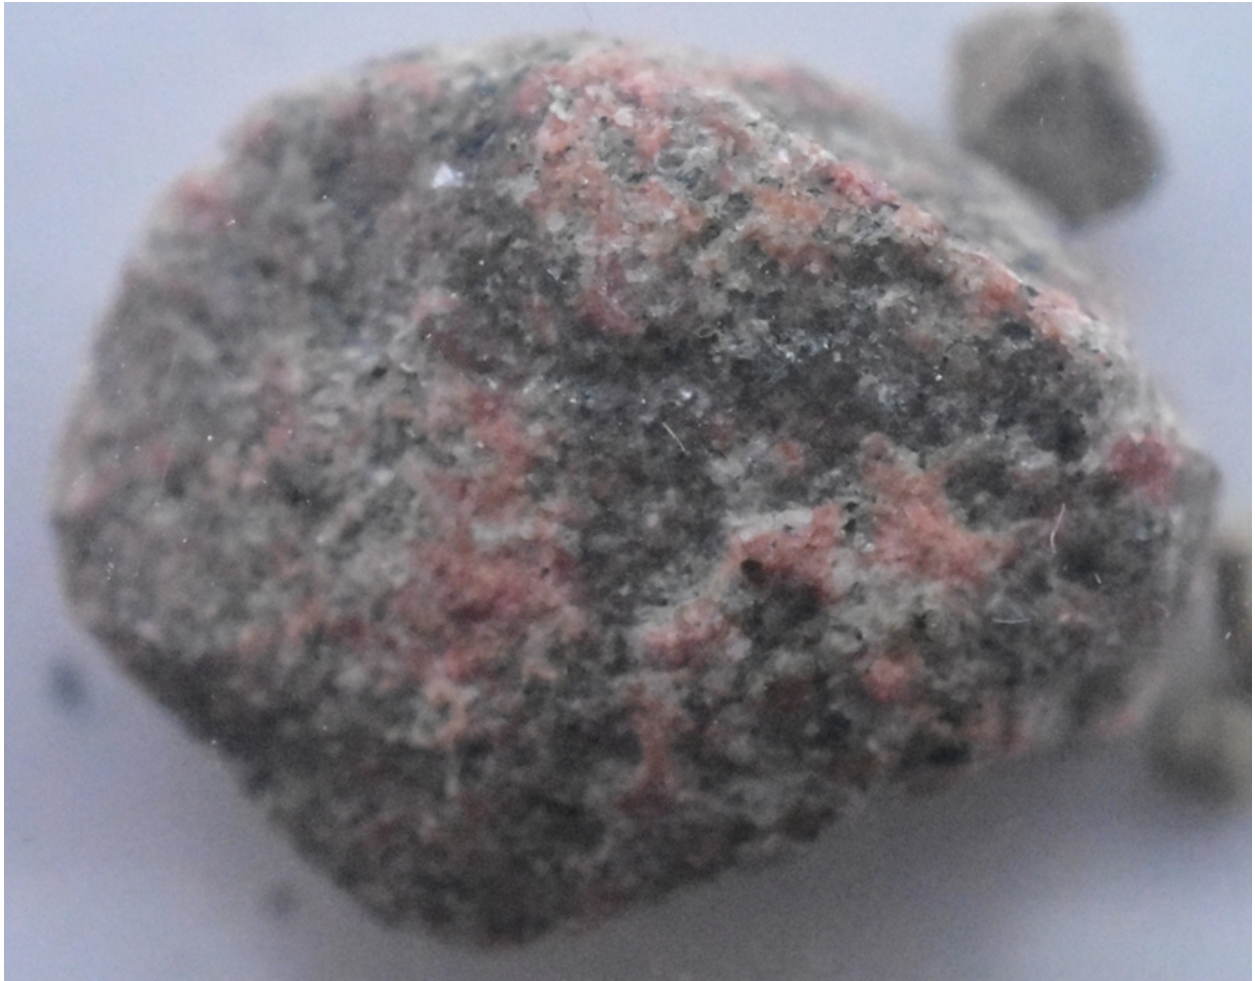

584

585 *Figure S1\_10: From figure S5, labelled as "sample 0".*

586 Based on the image, the rock appears to be a type of **granite**. Specifically, the pinkish mineral  
587 within the granite is likely **orthoclase feldspar**. The darker mineral is likely **biotite mica** or  
588 **hornblende**, and the lighter, granular mineral is likely **quartz**.

589

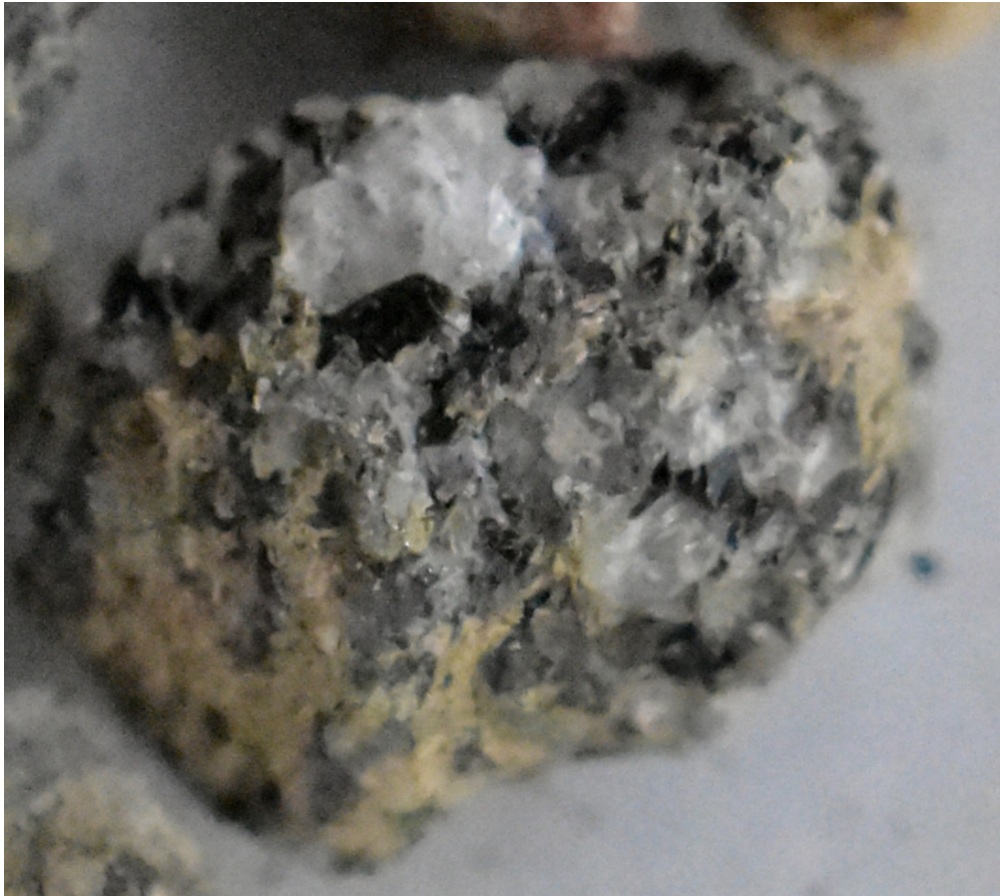

590

591 *Figure S1\_11: Labelled "1" in figure S9.*

592 Based on the visual characteristics, this appears to be a **granitic rock** or **granite**.

593 The texture suggests an aggregate of interlocking mineral crystals. The visible minerals appear to  
594 be:

- 595 ● **Feldspar:** Likely some form of plagioclase and/or alkali feldspar, contributing to the  
596 lighter, often somewhat opaque or translucent crystalline areas. The yellowish patches  
597 could also be weathered feldspar.
- 598 ● **Quartz:** The glassy, clear to translucent, irregular grains are likely quartz.
- 599 ● **Mica:** Darker, flaky minerals, possibly biotite, are visible as darker specks within the  
600 rock.

601

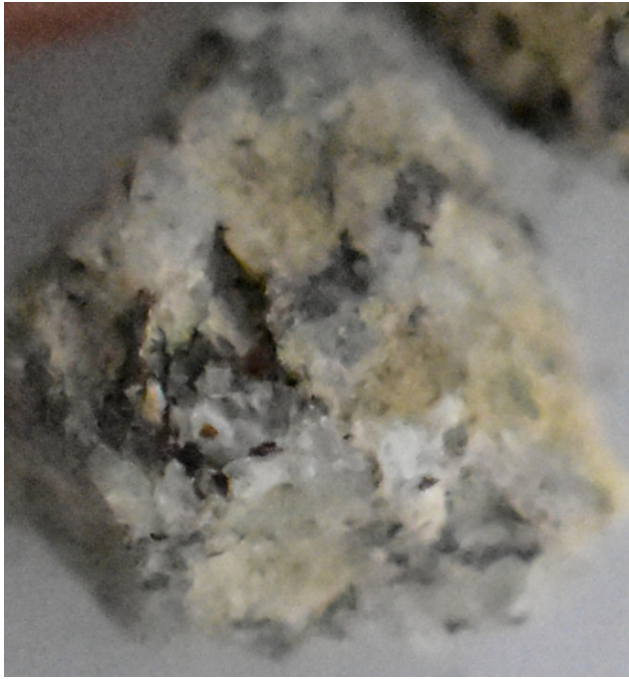

602

Figure S1\_12: Labelled "2" in figure S9

603 Based on the image, this rock appears to be **granite**. It displays a coarse-grained, interlocking  
604 texture with visible crystals of different minerals. The predominant colours suggest the presence  
605 of:

- 606
- 607 • **Feldspar** (likely potassium feldspar and plagioclase feldspar), which would contribute to the white and sometimes pinkish-yellowish hues.
  - 608 • **Quartz**, which would typically appear as glassy or milky white crystals.
  - 609 • **Mica** (like biotite or muscovite), which would form the darker, flaky or granular specks.

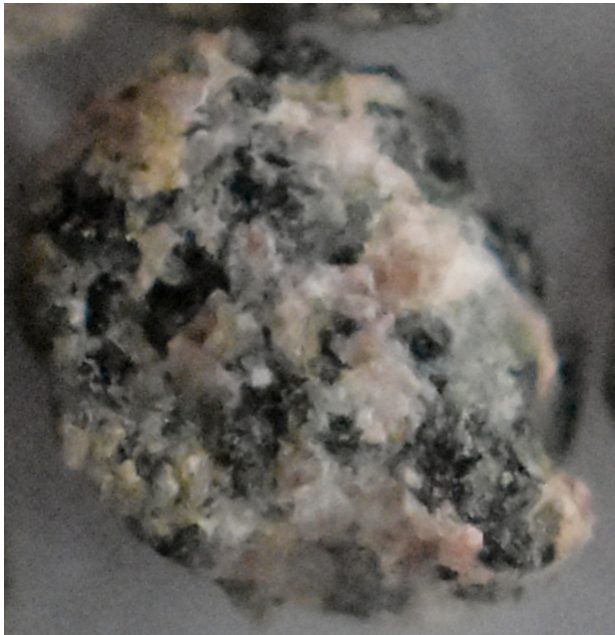

610

Figure S1\_13: Labelled "3" in figure S9

611 Based on the visual evidence, this appears to be a rock with a granular texture, composed of several  
612 distinct minerals. The prominent colours are white, pinkish-tan, and dark gray/black.

613 The white mineral is likely **feldspar**, possibly orthoclase or plagioclase. The pinkish-tan mineral  
614 could also be a variety of **feldspar**, such as microcline or perthite. The dark gray/black mineral is  
615 likely **biotite mica** or **hornblende**, common mafic minerals found in igneous rocks.

616 Considering the combination of these minerals, the rock is likely a **granite**. Within granite, the  
617 specific minerals can vary, but the overall appearance strongly suggests this igneous rock type.

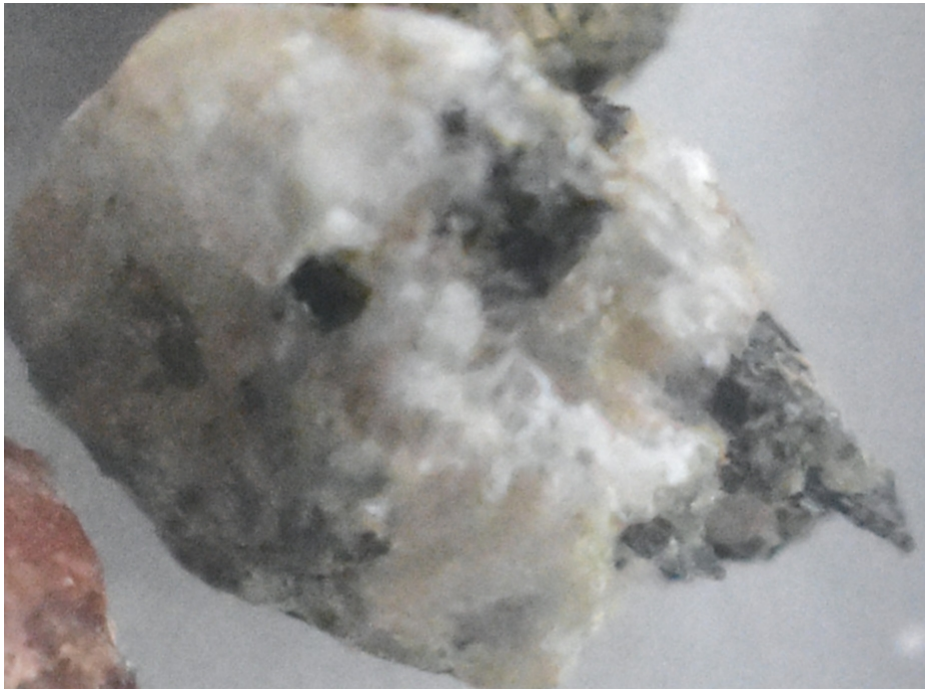

618  
619 *figure S9*

*Figure S1\_14: Labelled "4" in*

620 Based on the image, this appears to be a **feldspar** mineral, likely **plagioclase**, as part of a **granitic**  
621 **rock**.

622 The lighter, dominant mineral with a somewhat dull luster is characteristic of feldspar. The darker,  
623 granular areas could be other minerals commonly found in granite, such as **quartz** or **mica**, and the  
624 scattered dark specks might be **biotite** mica or other mafic minerals. Without further information or  
625 clearer detail on crystal structure, specific identification beyond plagioclase feldspar within a  
626 granitic context is difficult.

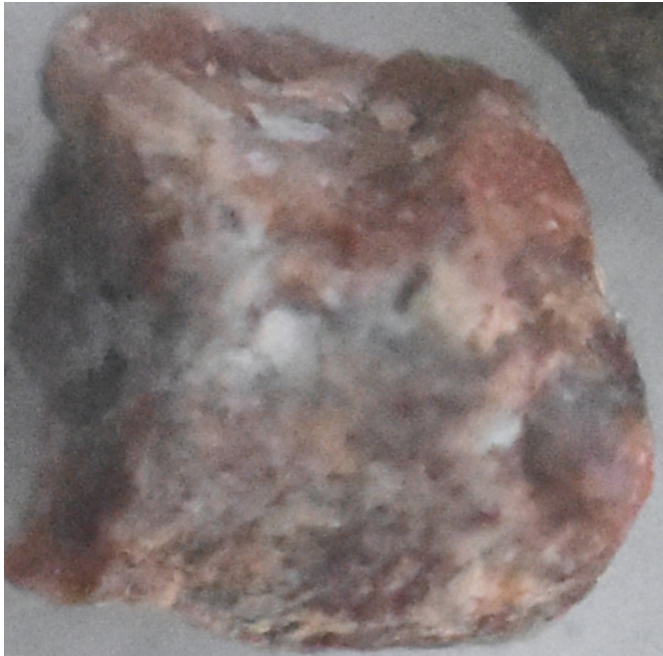

Figure S1\_15: Labelled "5" in figure S9

627

628 Based on the visual characteristics in the provided images, this appears to be a sample of **granite**.

629 Granite is an igneous rock composed primarily of quartz, feldspar, and mica. The colouring in the  
630 image, with its pinkish-brown and white components, is consistent with the typical appearance of  
631 granite where the feldspar and quartz are dominant.

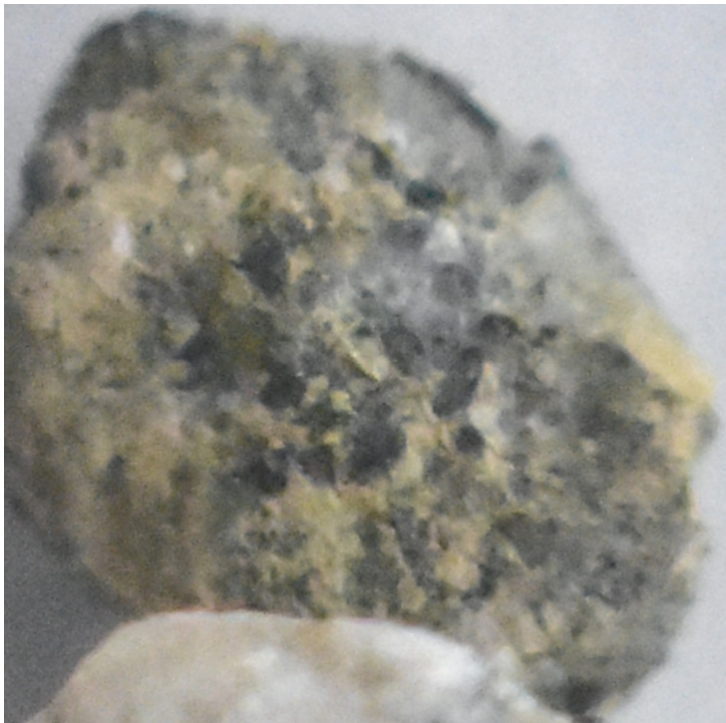

Figure S1\_16: Labelled "6" in figure S9

632

633 Based on the provided image, it is difficult to definitively identify the specific mineral species due  
634 to the low resolution and lack of detail. However, the rock appears to be an aggregate of various  
635 minerals. The greenish-yellowish hues combined with darker gray or black inclusions suggest a

636 composition that could include minerals like epidote, chlorite, or perhaps some amphibole group  
637 minerals. The lighter matrix might be quartz or feldspar.

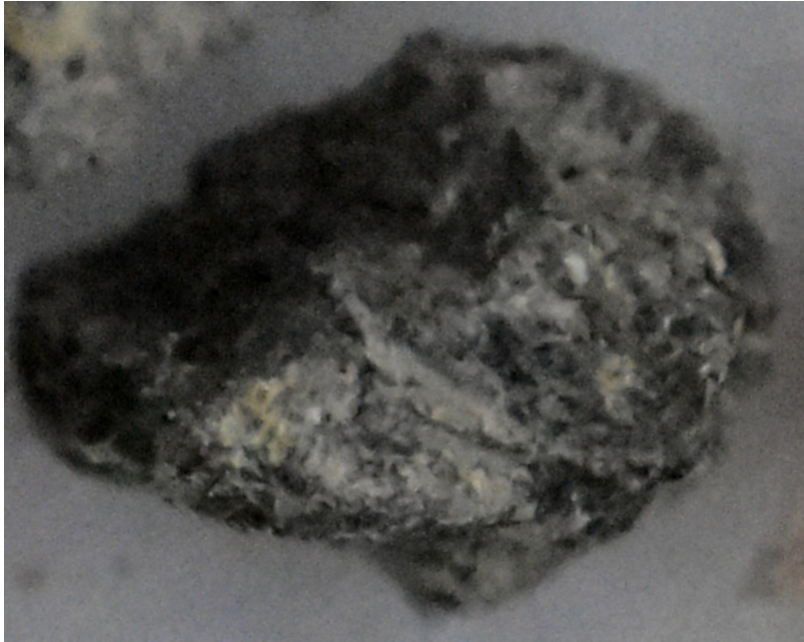

638 *Figure S1\_17: Labelled "7" in figure S9*

639 Based on the image, it appears to be a piece of **basalt**.

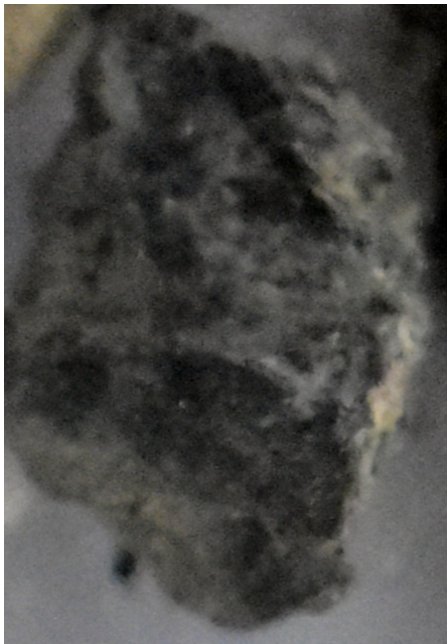

640 *Figure S1\_18: Labelled "8" in figure S9*

641 Based on the visual information, it is difficult to definitively identify the rock or mineral. The  
642 image is blurry and lacks clear crystalline structures or distinct colour variations that would allow  
643 for precise identification.

644 However, the general appearance suggests it could be a **rock** composed of various minerals,  
645 possibly **igneous or metamorphic** in origin, given the somewhat granular and variegated texture.  
646 It's hard to identify a specific mineral species from this image alone.

647

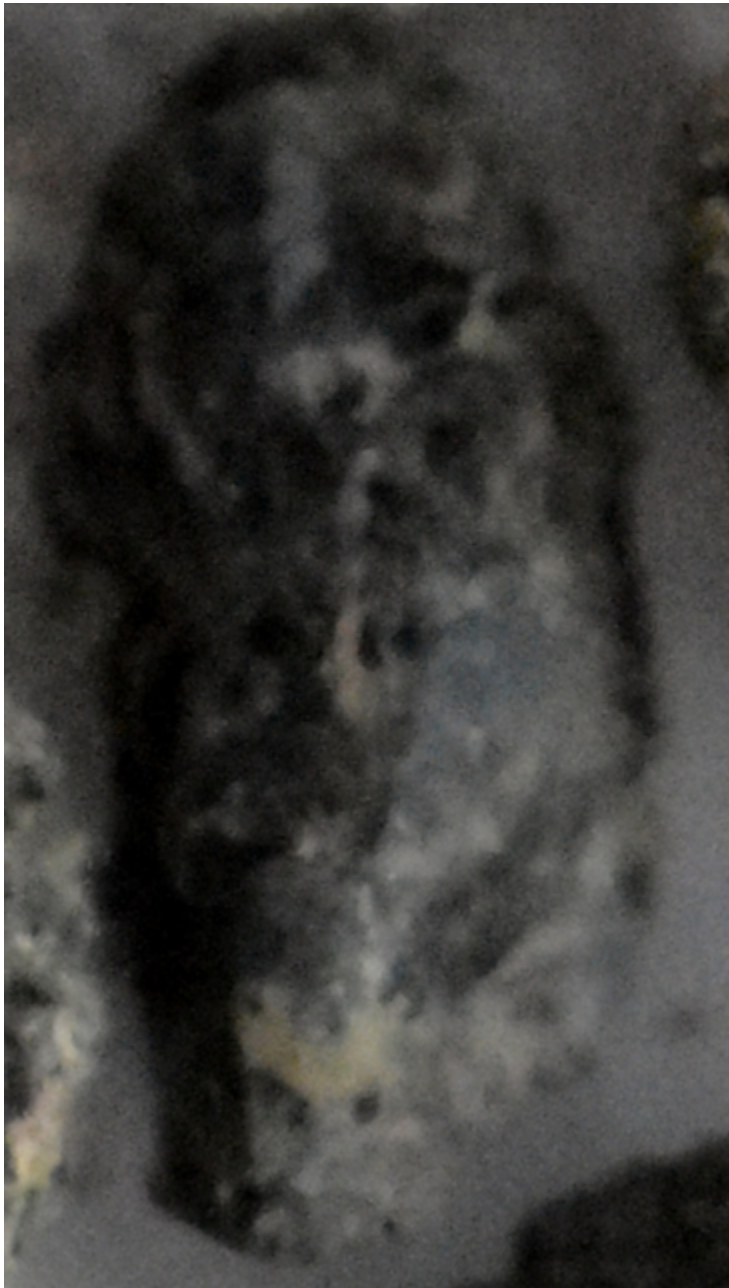

648 *Figure S1\_19: Labelled "9" in figure S9*

649

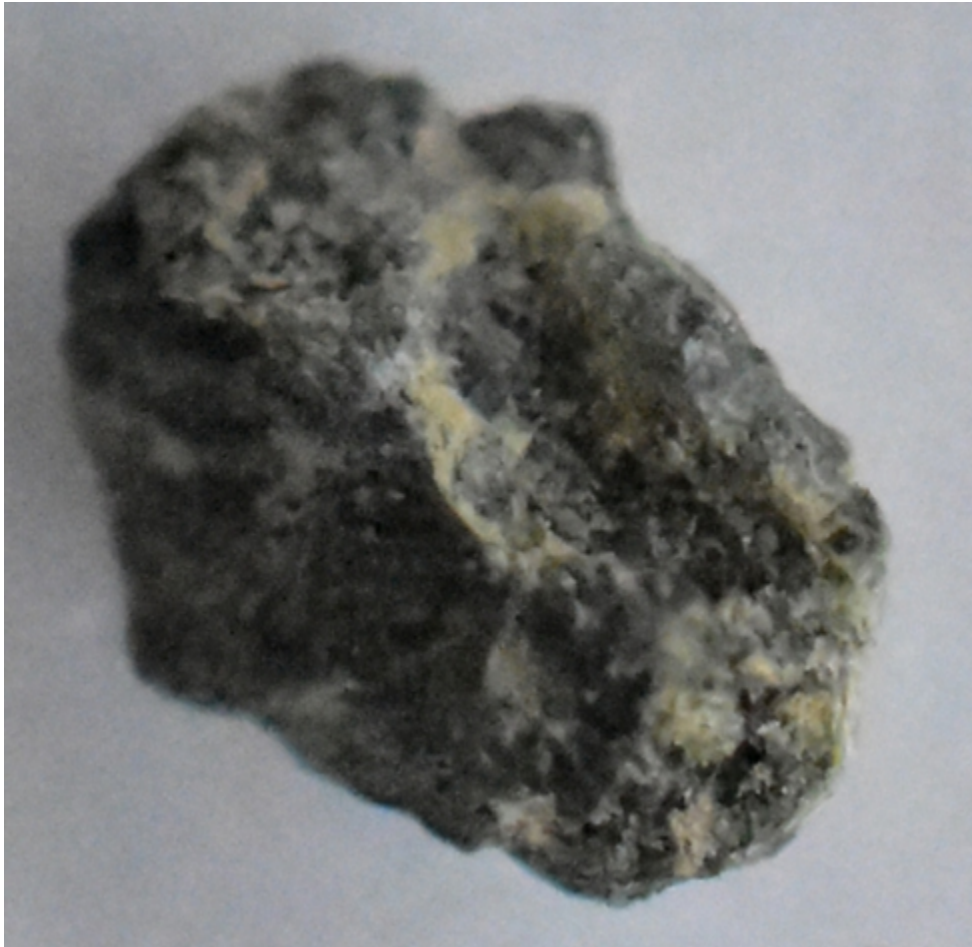

650  
651 "10" in figure S9

Figure S1\_20: Labelled

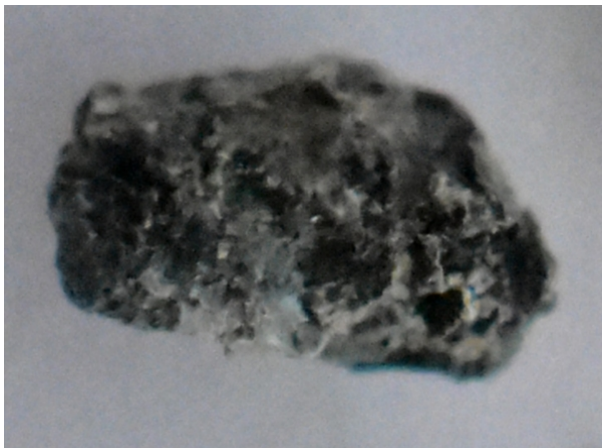

652  
653 Figure S1\_21: Labelled "11" in figure S9

653 Based on the visual characteristics, this appears to be a fragment of a **chondrite meteorite**, likely a  
654 **carbonaceous chondrite**.

655

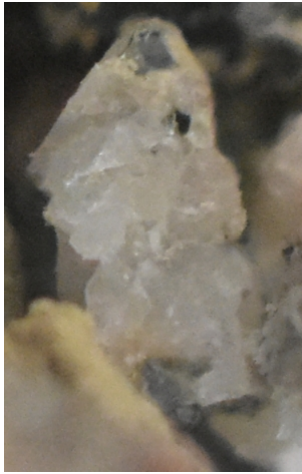

Figure S1\_22: Sample from figure S6

656

657 Based on the appearance in the image, the mineral is likely **Quartz**.

658 Specifically, it appears to be **Milky Quartz**. Milky quartz is the most common variety of quartz,  
659 characterised by its white, cloudy, or milky appearance. This cloudiness is often due to the  
660 presence of microscopic inclusions of gas, liquid, or other minerals trapped within the crystal  
661 structure during its formation. The overall translucent to opaque nature and the crystalline form  
662 visible in the image are consistent with milky quartz.

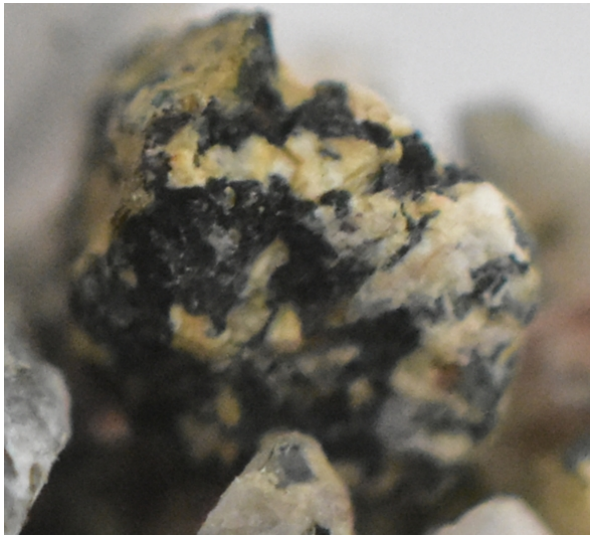

Figure S1\_23: Sample from figure S6

663

664 Based on the image, this appears to be a fragment of a rock, likely igneous, with visible crystals of  
665 different minerals. The speckled appearance with dark, light, and yellowish components suggests it  
666 could be a granite or a similar feldspar-rich rock containing mafic minerals.

667 Without further testing or a clearer view of crystal habits, it's difficult to pinpoint a specific mineral  
668 species with absolute certainty. However, the light-coloured mineral is likely a **Feldspar**, possibly  
669 **Orthoclase** or **Plagioclase** due to its common occurrence in such rocks. The dark mineral could be  
670 **Biotite** (a dark mica) or **Amphibole** (like hornblende). The yellowish tint might indicate some  
671 weathering or a specific composition within the feldspar group, perhaps involving potassium  
672 feldspar with some staining.
