# Supplementary material
Source: Research Square preprint supplement (doi:10.21203/rs.3.rs-9883712/v1)
Supplement: Supplementary file 3 [file a8729451a11a15285d2393cb.pdf]

## Supplement 3 - debris-rich ice logging 2025/2026

795

796 November 27, 2025

797 15 cm of core brought up.

798 Name: bag RD#1-25-26

799 Loggers depth: Not available

800 Description: 0-7cm from top (of drilled core section), best preserved and most consolidated with  
801 basal material content low. From 2-4 cm from top, the core is uniformly muddy with small  
802 sediment fragments visible, somewhat layered structure. 8 cm to the bottom, significantly  
803 fragmented, likely due to exposure to the drilling fluid liquid. When extracting it from the drill,  
804 drilling fluid came out. Interpretation: probably melted ice that re-solidified after the drilling  
805 activity.

806 Processed under red light conditions.

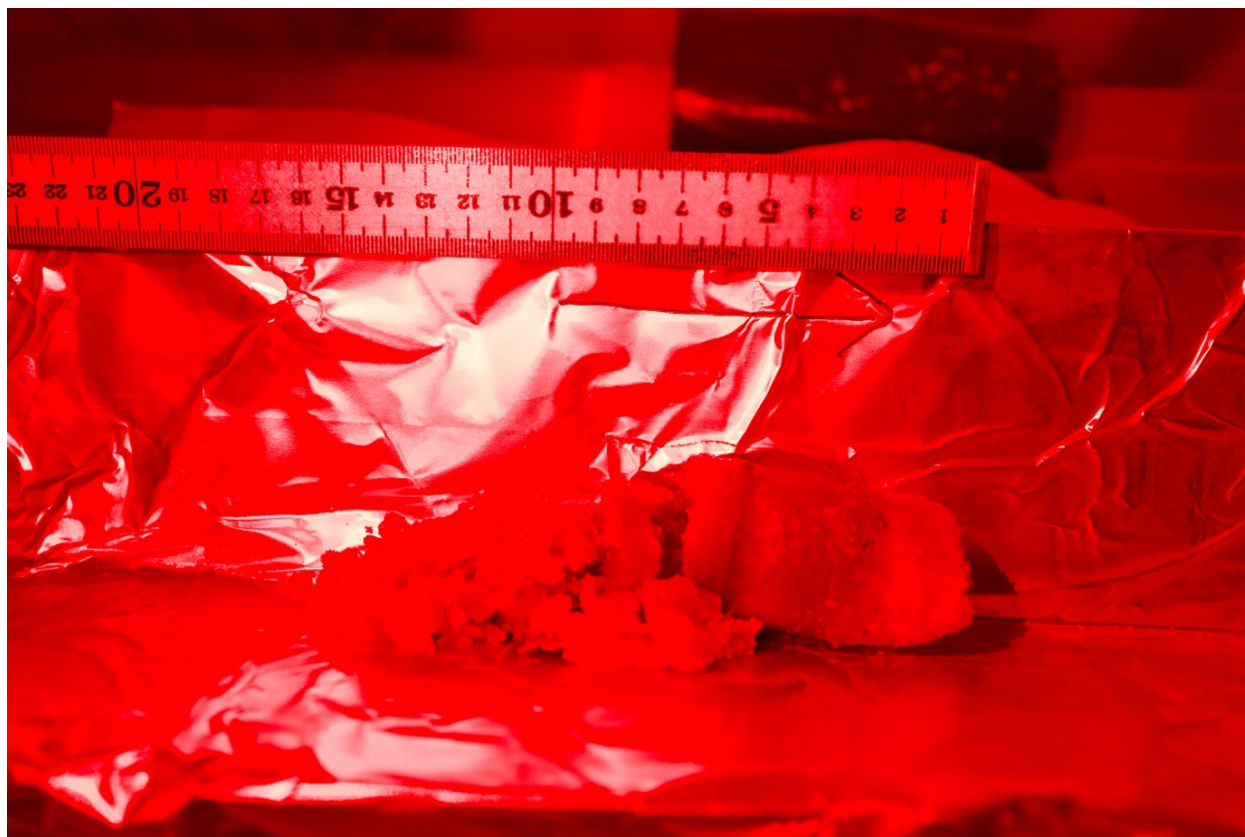

807

808 *Figure S3\_1: Bag RD#1-25-26 (15 cm) with red light. Top on the right.*

809 November 28, 2025

810 4,7 cm of core brought up.

811 Name: bag RD#2-25-26

812 Description: preserved and mostly consolidated ice. The basal material content is low. Small  
813 sediment fragments are visible in a somewhat layered structure. When extracting it from the drill, a  
814 lot of drilling fluid came out. Interpretation: probably melted ice that re-solidified after the drilling  
815 activity.

816 Logged under red light conditions.

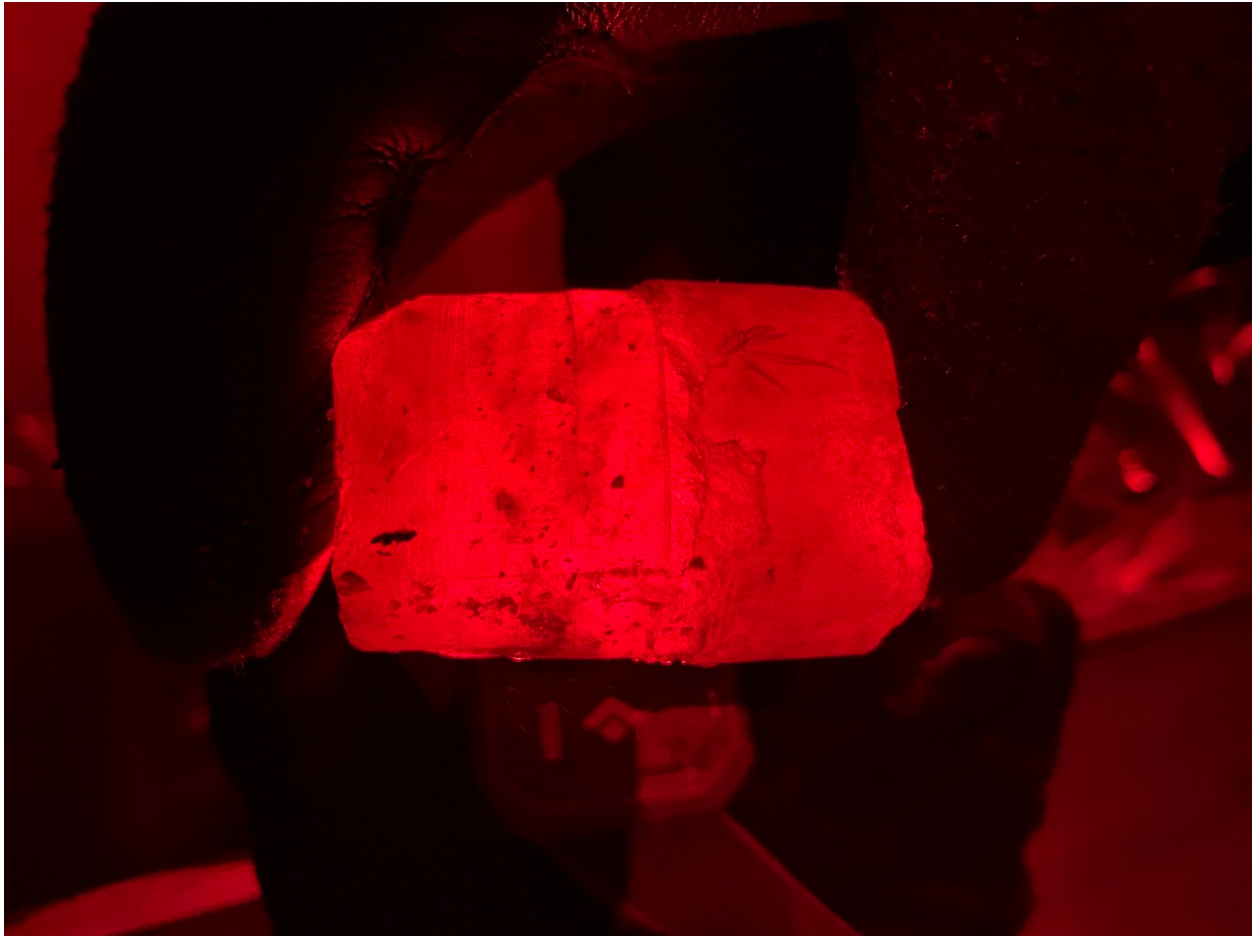

817

818 *Figure S3\_2: Bag n. RD#2-25-26 (4,7 cm) top on the left.*

819

820

821 November 29, 2025

822 Core / basal material brought to surface.

823 Name: Bag RD#3-25-26

824 Description: Inconsistent ice extracted without a core catcher. For this reason, the bottom end, as  
825 well as two pieces of ice that fell out at the top during core extraction or drill travel. These pieces  
826 were exposed to sunlight. Everything taken out and logged under red light.

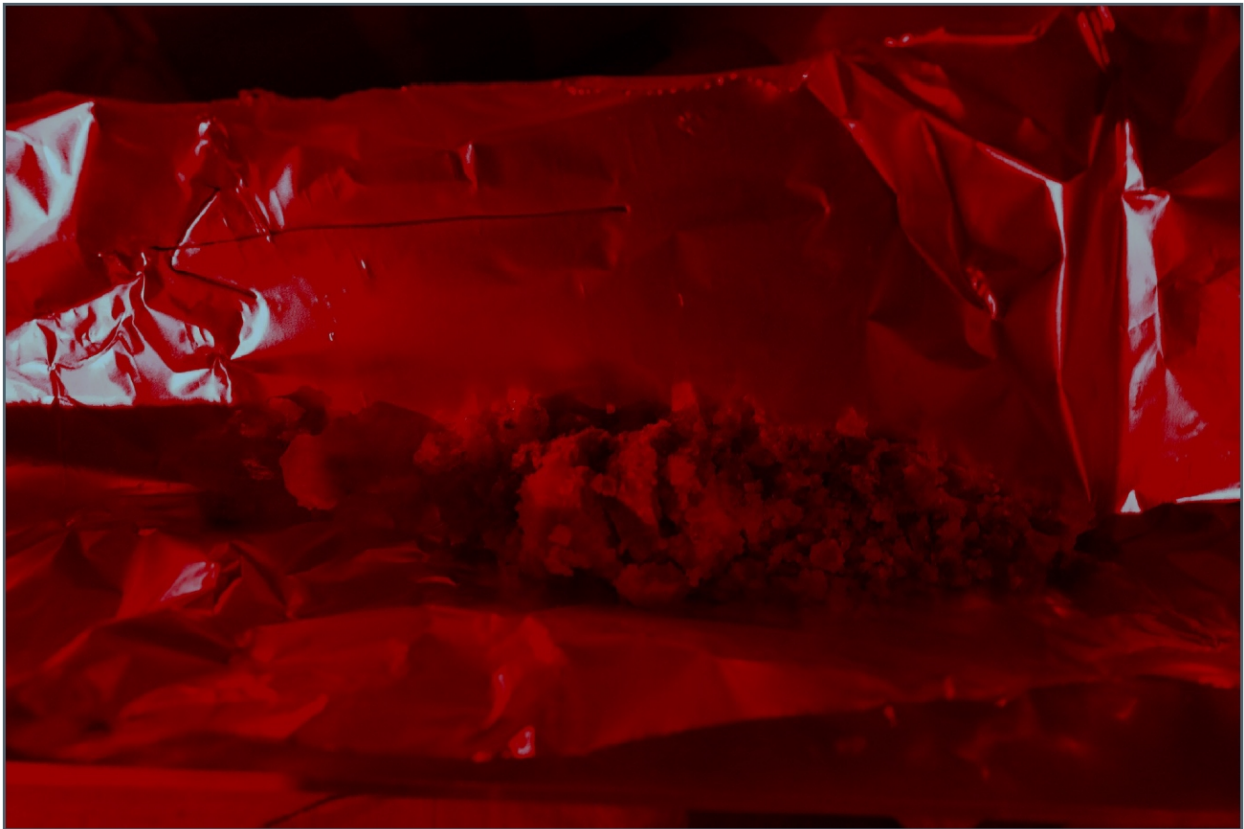

827

828 *Figure S3\_3: Bag n. RD3-25-26, top to the left.*

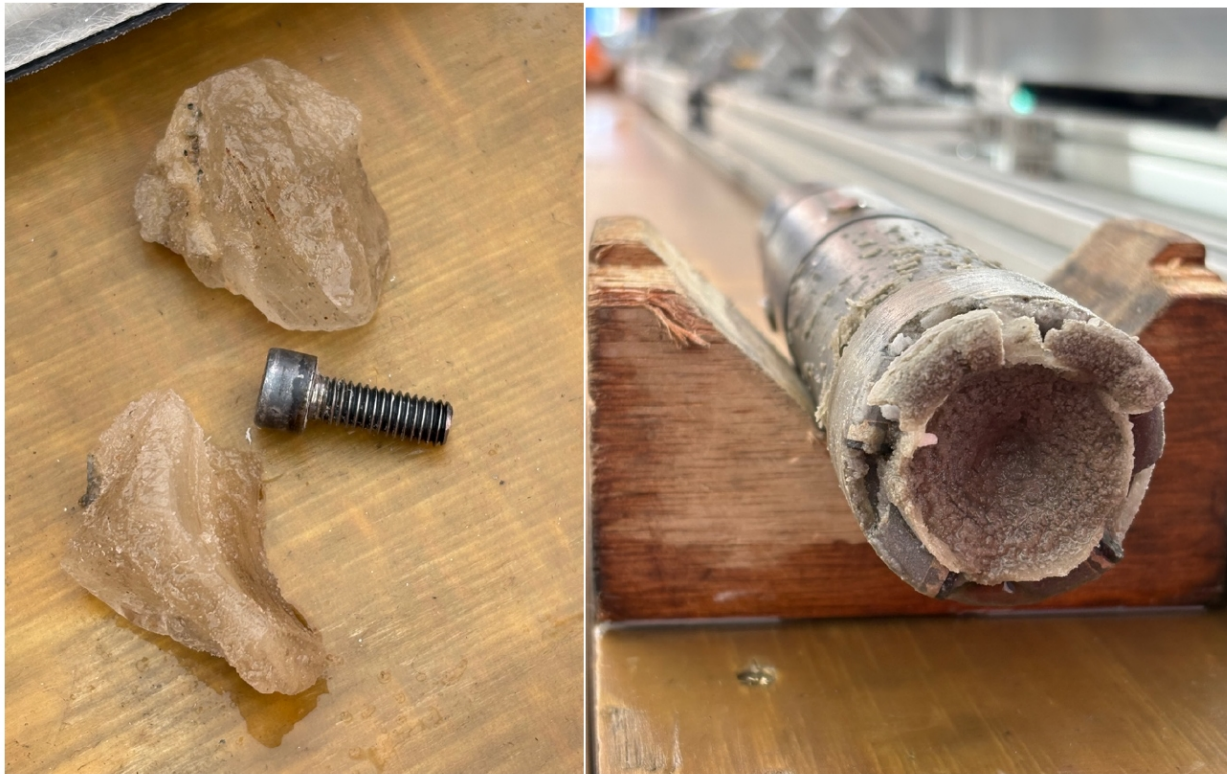

829  
830 *Figure S3\_4: Bag n. RD3-25-26. Left: The two pieces that fell out at the top of the drill. Right: refrozen material in and around the*  
831 *drillhead.*

832 November 30, 2025

833 Core was brought up.

834 Name: Bag RD#4-25-26

835 Description: Inconsistent ice and pebbles extracted without core catchers on the drill. Under red  
836 light conditions the size of the pebbles seems to be a bit bigger than before.

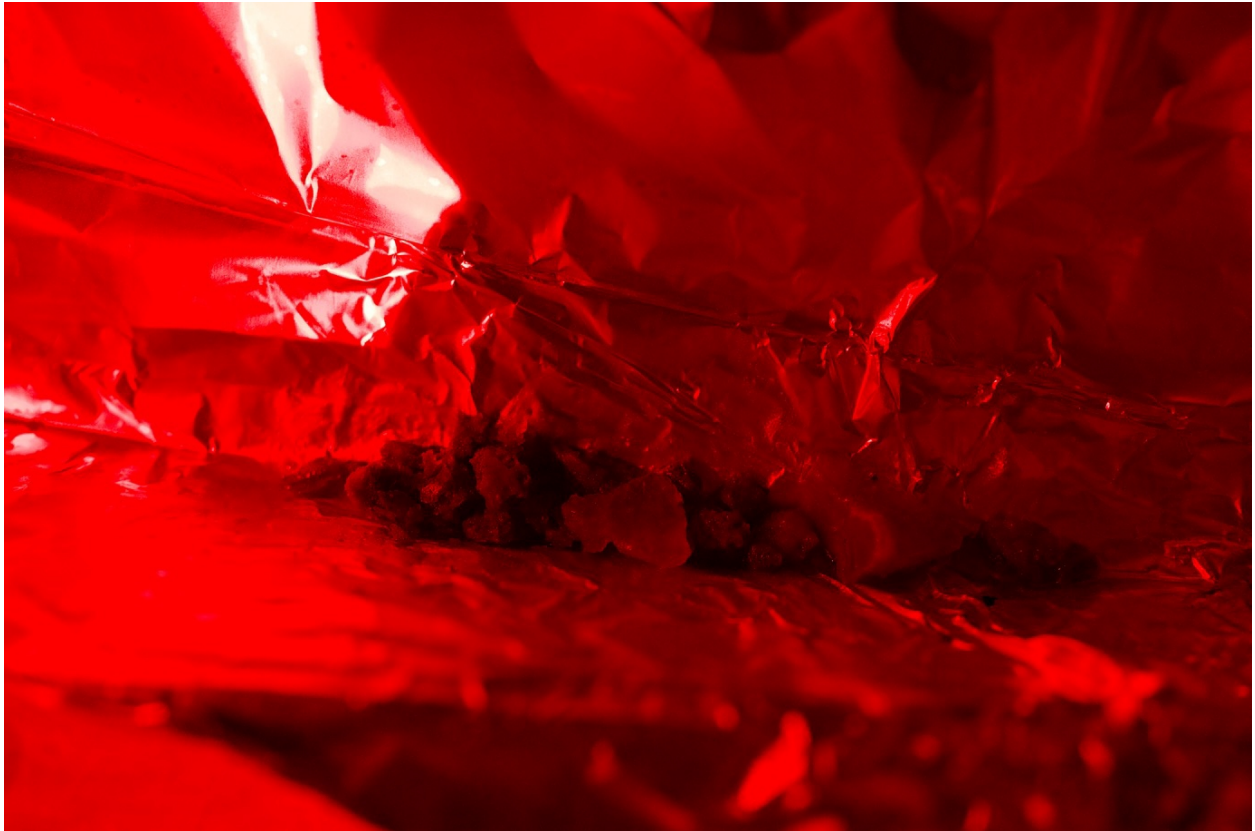

837

838 *Figure S3\_5: Bag n. RD#4-25-26.*

839

840 December 04, 2025

841 6,6 cm of core was brought up.

842 Name: Bag RD#5-25-26

843 Three well-preserved and highly consolidated pieces were recovered. The first one on the left  
844 corresponds to the top of the sample: it consists of a small ice fragment with a possible piece of  
845 sediment on its upper part. The middle piece—approximately 1.5 cm long—contains a high  
846 proportion of rock material and is noticeably darker than the other recovered fragments. The piece  
847 on the right corresponds to the bottom of the sample and consists of about 3 cm of ice with clearly  
848 visible sediment inclusions. The white plastic piece on the right (right of the measuring stick) is  
849 used for core extraction.

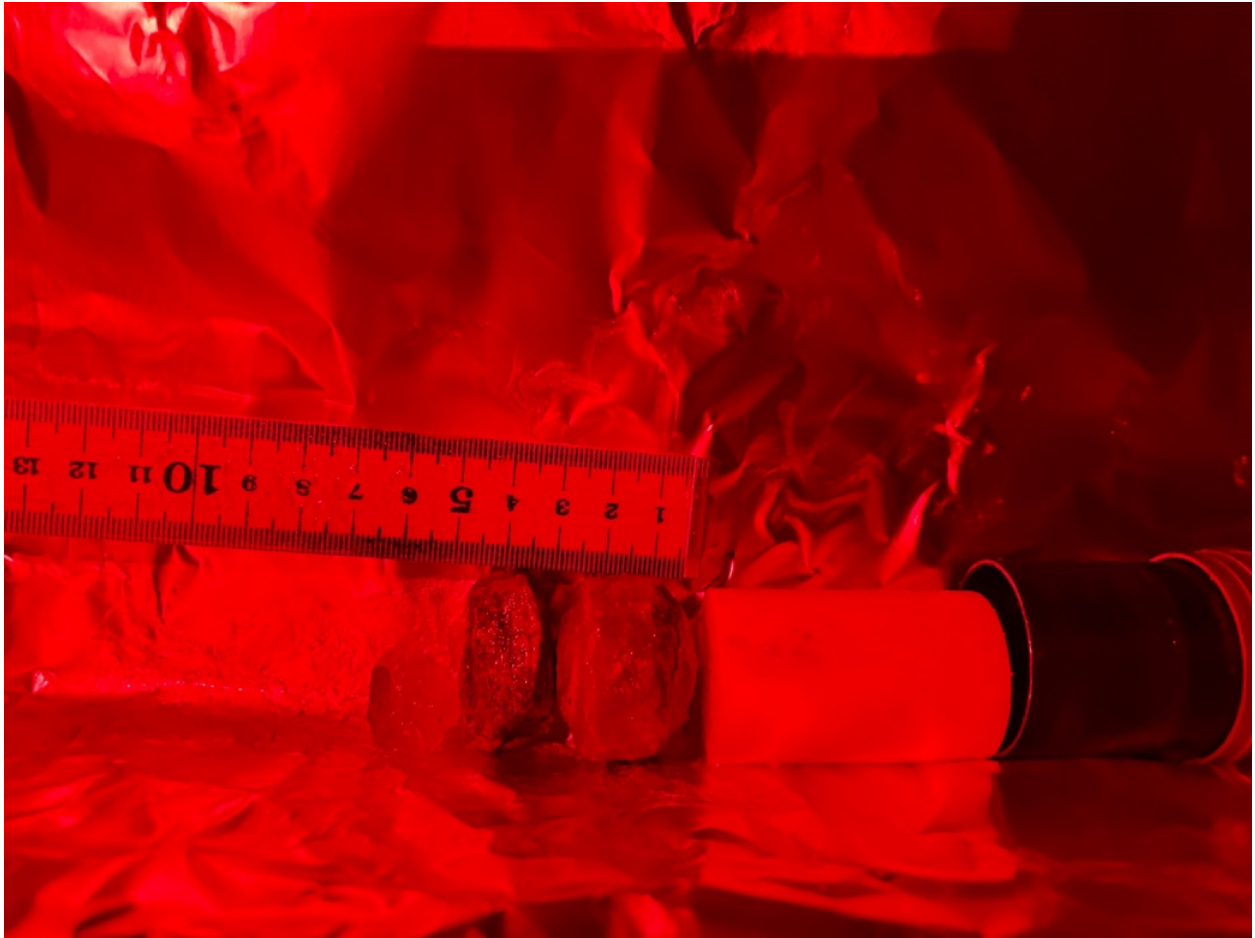

850

851 *Figure S3\_6: Bag n. RD5-25-26: top on the left.*

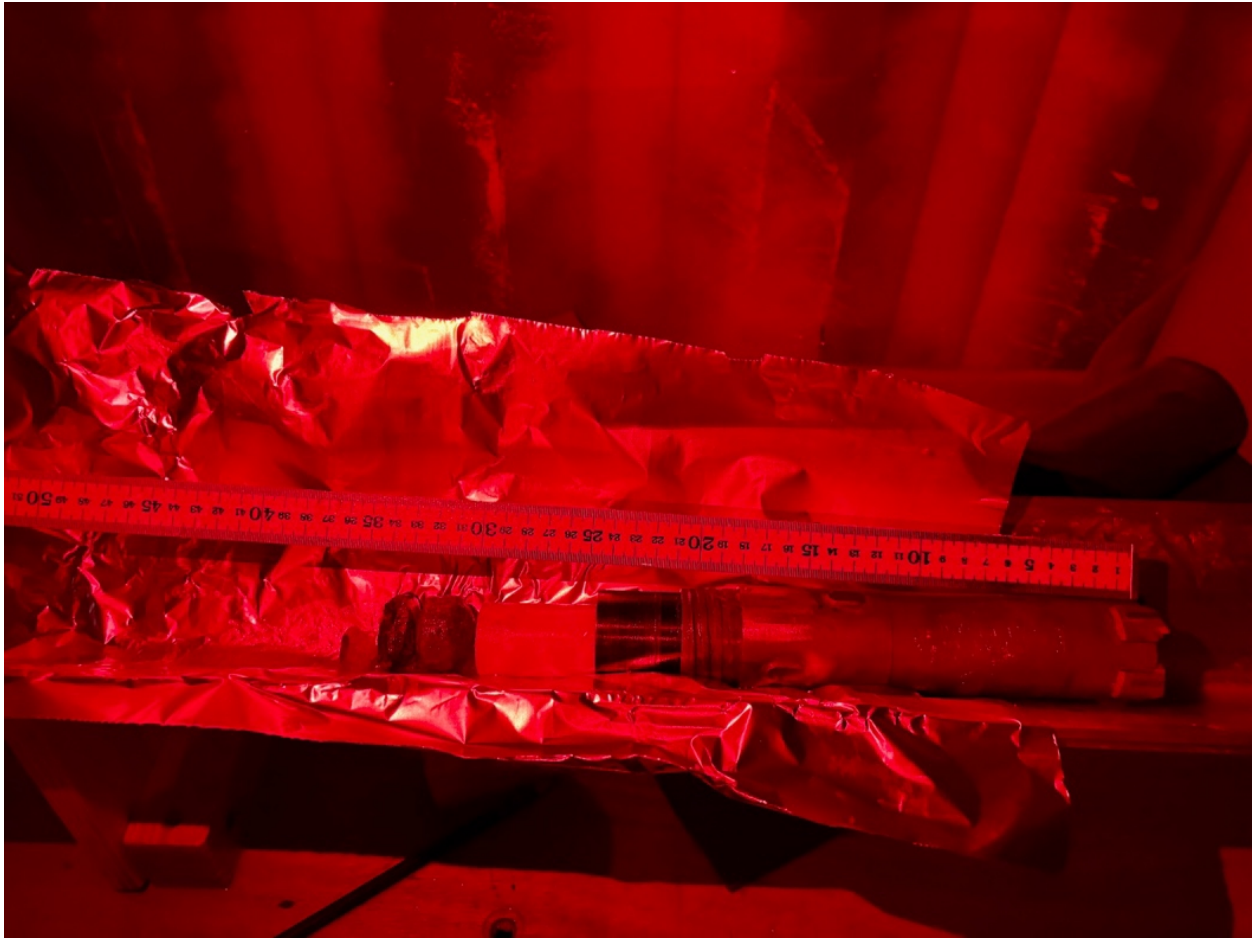

852

853 *Figure S3\_7: Bag n. RD5-25-26. top on the left.*
